# Supplementary material for: Unveiling the charge storage mechanisms of Co-based perovskite fluoride in a mild aqueous electrolyte
Source: Royal Society of Chemistry journal article supplement (doi:10.1039/d4nr02522a), 2024-01-01
Supplement: d4nr02522a2.pdf [file d4nr02522a2.pdf]

## Supporting Information

### **Unveiling the charge storage mechanisms of Co-based perovskite fluoride in mild aqueous electrolyte**

Yuzhen Zhang<sup>†</sup>, Miao Liu<sup>†</sup>, Rui Ding\*, Yi Li, Jian Guo, Qi Fang, Miao Yan, Jinmei Xie

Key Laboratory of Environmentally Friendly Chemistry and Applications of Ministry of Education, College of Chemistry, Xiangtan University, Xiangtan, Hunan 411105, P.R. China.

\*Corresponding author: Rui Ding.

\*E-mail: [drm8122@xtu.edu.cn](mailto:drm8122@xtu.edu.cn); [drm8122@163.com](mailto:drm8122@163.com)

<sup>†</sup>Note: Yuzhen Zhang and Miao Liu equally contribute to the work.

| <b>Table of contents</b>    |                                                                                                                                                                                                                                                                                                             |
|-----------------------------|-------------------------------------------------------------------------------------------------------------------------------------------------------------------------------------------------------------------------------------------------------------------------------------------------------------|
| <b>Experimental section</b> |                                                                                                                                                                                                                                                                                                             |
| <b>Section 1.</b>           | Synthesis of materials                                                                                                                                                                                                                                                                                      |
| <b>Section 2.</b>           | Characterizations                                                                                                                                                                                                                                                                                           |
| <b>Section 3.</b>           | Electrochemical measurements                                                                                                                                                                                                                                                                                |
| <b>Section 4.</b>           | Calculations for $m_-/m_+$ , $Q_m$ , $E_m$ , $P_m$ .                                                                                                                                                                                                                                                        |
| <b>Section 5.</b>           | The calculations of diffusion coefficients.                                                                                                                                                                                                                                                                 |
| <b>Section 6.</b>           | EQCM Investigations                                                                                                                                                                                                                                                                                         |
| <b>Supplemental figures</b> |                                                                                                                                                                                                                                                                                                             |
| <b>Figure S1.</b>           | XRD patterns of as-synthesized $\text{KCoF}_3$ in this work.                                                                                                                                                                                                                                                |
| <b>Figure S2.</b>           | (a) Crystal microstructure of perovskite fluorides $\text{KCoF}_3$ and (b) crystalline parameters of standard $\text{KCoF}_3$ .                                                                                                                                                                             |
| <b>Figure S3.</b>           | (a, b) SEM, (c, d) TEM images of $\text{KCoF}_3$ sample.                                                                                                                                                                                                                                                    |
| <b>Figure S4.</b>           | EDS of $\text{KCoF}_3$ sample.                                                                                                                                                                                                                                                                              |
| <b>Figure S5.</b>           | The first four CV curves at $10 \text{ mV s}^{-1}$ .                                                                                                                                                                                                                                                        |
| <b>Figure S6.</b>           | (a) CV curves at $2 \sim 160 \text{ mV s}^{-1}$ , (b) GCD curves at different current densities of the nickel foam (NF) electrode in $1 \text{ M Na}_2\text{SO}_4$ electrolyte. (c) comparison of CV ( $10 \text{ mV s}^{-1}$ ) and (d) GCD ( $1 \text{ A g}^{-1}$ ) for $\text{KCoF}_3$ and NF electrodes. |
| <b>Figure S7.</b>           | Ex situ FTIR spectrum graphs of the $\text{KCoF}_3$ electrode in pristine state and assigned charge/discharge states during the first CV cycle at $10 \text{ mV s}^{-1}$ .                                                                                                                                  |
| <b>Figure S8.</b>           | Ex situ Raman spectrum graphs of the $\text{KCoF}_3$ electrode in pristine state and assigned specific charge/discharge states during the first CV cycle at $10 \text{ mV s}^{-1}$ .                                                                                                                        |
| <b>Figure S9.</b>           | Ex situ TEM images of $\text{KCoF}_3$ electrode (a, b) in charging to $1.25 \text{ V}$ state, (c, d) in discharging to $-1.1 \text{ V}$ state of the first CV cycle at $10 \text{ mV s}^{-1}$ .                                                                                                             |

---

**Figure S10.**

(a) CV curves for the first five cycles, (b) Raw EQCM data of the  $\text{KCoF}_3$  electrode in 1 M  $\text{Na}_2\text{SO}_4$  electrolyte (tested in the EQCM equipment).

**Figure S11.**

Aqueous ECs with positive and negative mass ratios of 1-1, 1-2, 1-3 (a, c, e) CV plots at  $10\sim 160\text{ mV s}^{-1}$ , (b, d, f) GCD curves at different current densities.

**Figure S12.**

Aqueous ECs with positive and negative mass ratios of 2-1, 3-1, 4-1 (a, c, e) CV plots at  $10\sim 160\text{ mV s}^{-1}$ , (b, d, f) GCD curves at different current densities.

**Figure S13.**

(a) Ragone plot (The detailed drawing for aqueous ECs structure), (b) cycling stability of aqueous ECs in different proportions.

#### **Supplemental tables**

**Table S1.**

Materials / Chemicals used in this work.

**Table S2.**

The EIS parameters before and after cycling for  $\text{KCoF}_3$  electrode.

**Table S3.**

The crystalline parameters of the newly-formed phases in the fully charged and discharged states of  $\text{KCoF}_3$  electrode.

#### **Supplemental references**

---

## **Experimental section**

### **Section 1. Synthesis of materials**

AR or GR grade chemicals were used directly in the synthesis (Table S1). The KCoF<sub>3</sub> sample was prepared by a simple one-pot solvothermal method. The processes are as follows: i) Add 2 mmol CoCl<sub>2</sub>·6H<sub>2</sub>O, 5 mmol KF·2H<sub>2</sub>O and 0.2 g PVP-K30 were into 36 ml ethylene glycol (EG) solvents; ii) the mixture was magnetically stirred and dispersed in an ultrasonic bath at 100 W for 30 minutes; iii) the mixture was transferred into a 50 mL Teflon-lined stainless steel autoclave, which was heated at 180°C for 6 h in an electric oven; iv) After cooling down to room temperature, the precipitates were collected by centrifugal filtration along with washing with absolute alcohol for several times, and finally dried at 95°C overnight to obtain the ultimate products.

### **Section 2. Characterizations**

The phase property and crystal structure were checked by X-ray diffraction (XRD). X-ray photoelectron spectra (XPS), Fourier transform infrared spectroscopy (FT-IR), and Raman spectroscopy (RS) were used to investigate the surface compositions, chemical bonding and electronic structure. The morphology and size of particles are analyzed by scanning electron microscopy (SEM) and transmission electron microscopy (TEM). The crystalline microstructures are resolved by the high-resolution TEM (HRTEM) and selected area electron diffraction (SAED). The element composition and distribution were measured by the X-ray energy dispersive spectroscopy (EDS), inductively coupled plasma atomic emission spectrometry (ICP-OES) and mapping. The specific surface area, pore volume and size distribution are examined by nitrogen sorption isothermals with Brunauer-Emmett-Teller (BET) and Barrett-Joyner-Halenda (BJH) methods.



### Section 3. Electrochemical measurements

The electrodes were prepared by pressing the well-mixed slurry into the nickel foam (NF) current collector followed by thorough drying at 95 °C for 12 h in an air atmosphere. The slurry was made up of specific active materials KCF, acetylene black (AB) conductive agent and polyvinylidene difluoride (PVDF) binder in a weight ratio of 7/2/1 (dissolved in N-methyl-2-pyrrolidone (NMP)). The size of the electrode sheet is  $0.5 \times 1.0 \text{ cm}^2$ , the active mass loading was about  $3.5\text{-}4.0 \text{ mg cm}^{-2}$ . The electrochemical tests were carried out by electrochemical impedance spectroscopy (EIS), cyclic voltammetry (CV) and galvanostatic charge-discharge (GCD) with a CHI660E electrochemical workstation and Neware-CT-4008 testers. The single electrodes were tested using a three-electrode system, with the target material under study (NF coated with an active substance) as working electrode (WE), a Pt sheet was employed as counter electrode (CE), and Ag/AgCl (Satd. KCl) as reference electrode (RE). The tests for the AC//KCF ASCs were conducted in an unicell with the commercial AC as the anode and KCF as cathode. The electrolytes in all tests were 1 M  $\text{Na}_2\text{SO}_4$  aqueous solutions at room temperature.

### Section 4. calculations for $m/m_+$ , $Q_m$ , $E_m$ , $P_m$ .

For ECs, a typical two-electrode cell was used. The mass ratios of positive and negative active materials was calculated based on the charge-balance ( $Q_+ = Q_-$ ), as shown in Eq. (1). The values of specific capacity ( $Q_m$ ,  $\text{C g}^{-1}$ ) for electrodes/full cells, energy density ( $E_m$ ,  $\text{Wh kg}^{-1}$ )/power density ( $P_m$ ,  $\text{kW kg}^{-1}$ ) for full cells were calculated according to the Eqs. (1)-(4).

$$m(+)/m(-) = Q_m(-)/Q_m(+) \quad (1)$$

$$Q_m = It/m \quad (2)$$

$$E_m = (Q_m \Delta V)/7.2 \quad (3)$$

$$P_m = 3.6 E_m/t_d \quad (4)$$

Where  $m$ ,  $Q_m$ ,  $\Delta V$ , and  $t_d$  refer to the mass of active materials (g, for single electrodes, it indicates the mass of anode or cathode materials; for full cells, it means the masses of active materials of both anode and cathode), specific charge or discharge quantity ( $C\ g^{-1}$ , for anode, it means the charge quantity; for cathode and full-cells, it refers to the discharge quantity), voltage window (V, for ECs, two stages of voltage windows were used according to the knee points of discharging branches of GCD plots), and discharging time (s), respectively.

## Section 5. The calculations of diffusion coefficients.

The diffusion coefficients were acquired by Galvanostatic Intermittent Titration Technique (GITT). The calculation method is based on the following equation (5):

$$D^{GITT} = \frac{4}{\pi\tau} \left( \frac{m_B V_M}{M_B S} \right)^2 \left( \frac{\Delta E_S}{\Delta E_\tau} \right)^2 \quad (5)$$

where  $\tau$  represents the constant current pulse time,  $m_B$ ,  $V_M$  and  $M_B$  are the mass loading, the molar volume, and the molar mass of the electrode material, respectively.  $S$  is the area of the electrode electrolyte interface,  $\Delta E_S$  is the change of steady-state voltage during a single-step GITT experiment, and  $\Delta E_\tau$  stands for the total change of cell voltage during a constant current pulse  $\tau$  of a single-step GITT experiment regardless of the IR-drop.<sup>1</sup>

## Section 6. EQCM Investigations

A CHI400C electrochemical workstation (Shanghai, China) equipped with a quartz crystal microbalance was used to simultaneously collect CV and EQCM data. In-situ electrochemical measurements were performed using KCoF<sub>3</sub> coated quartz as the working electrode, Pt foil as the counter electrode, and Ag/AgCl (Satd. KCl) electrode as the reference electrode, and 1 M Na<sub>2</sub>SO<sub>4</sub> as the electrolytes. The KCoF<sub>3</sub> coated quartz electrodes were prepared by dispersing KCoF<sub>3</sub> (14 mg), AB (4 mg) and PVDF (2 mg) in 11 drops of NMP followed by ultrasonication for 30 mins to form homogeneous suspensions, then transfer 4.4  $\mu$ L of suspension to the surface of the

quartz wafer and dry at 35 °C to volatilize the solvent. The CV measurements of the KCoF<sub>3</sub> coated quartz electrode were performed in a constant sweep rate with simultaneous collection of the resonance frequency. The EQCM data for frequency change  $\Delta f$  of the crystal and mass changes ( $\Delta m$ ) correspond the Sauerbrey equation:<sup>2</sup>

$$\Delta m = -\frac{A\sqrt{\mu_q\rho_q}}{2f_0^2} \cdot \Delta f = -C_f \cdot \Delta f \quad (6)$$

where  $f_0$  is the resonant frequency of the crystal (7.995 MHz),  $A$  is an area of the Au disk coated on the crystal (0.196 cm<sup>2</sup>),  $\mu_q$  is the AT-cut quartz constant (2.947×10<sup>11</sup> g cm<sup>-1</sup> s<sup>-1</sup>),  $\rho_q$  is the density of the crystal (2.684 g cm<sup>-3</sup>). So the sensitivity factor of the quartz crystal  $C_f$  was 6.9 ng Hz<sup>-1</sup> cm<sup>-2</sup>. Here, the molar weight of the carrier can be calculated according to the following equation:<sup>3</sup>

$$M_w = \frac{\Delta m nF}{\Delta Q} = \frac{C_f(-\Delta f)nf}{\Delta Q} \quad (7)$$

Where  $F$  is the Faraday constant (96500 C mol<sup>-1</sup>),  $n$  is the valence number of the ion ( $n = 1$  for Na<sub>2</sub>SO<sub>4</sub> electrolyte),  $\Delta Q$  is the charge passed through the electrode (C).

# Supplemental figures

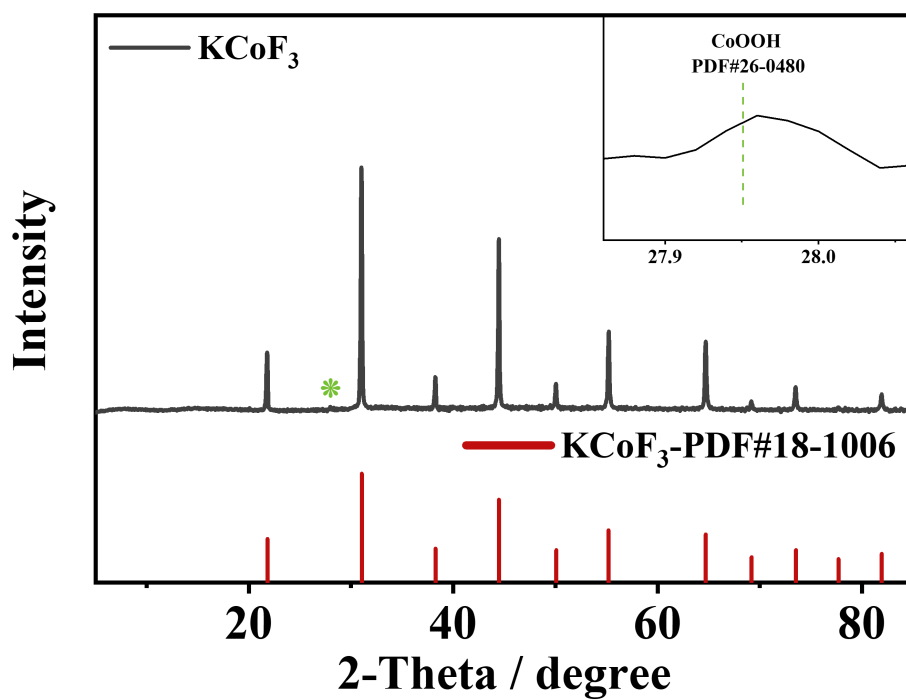

**Figure S1.** XRD patterns of as-synthesized  $\text{KCoF}_3$  in this work.

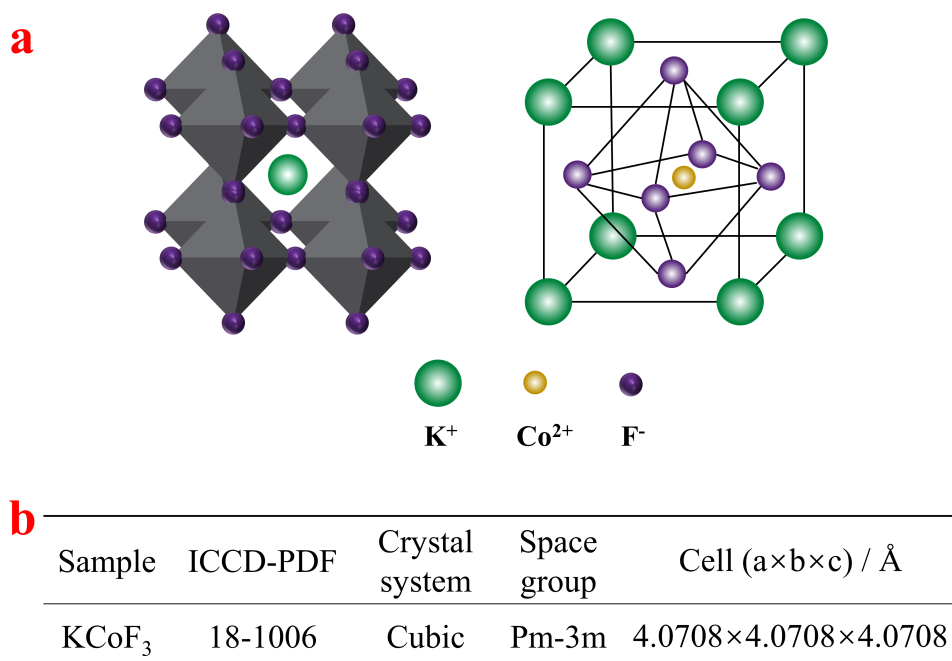

**Figure S2.** (a) Crystal microstructure of perovskite fluorides  $\text{KCoF}_3$  and (b) crystalline parameters of standard  $\text{KCoF}_3$ .

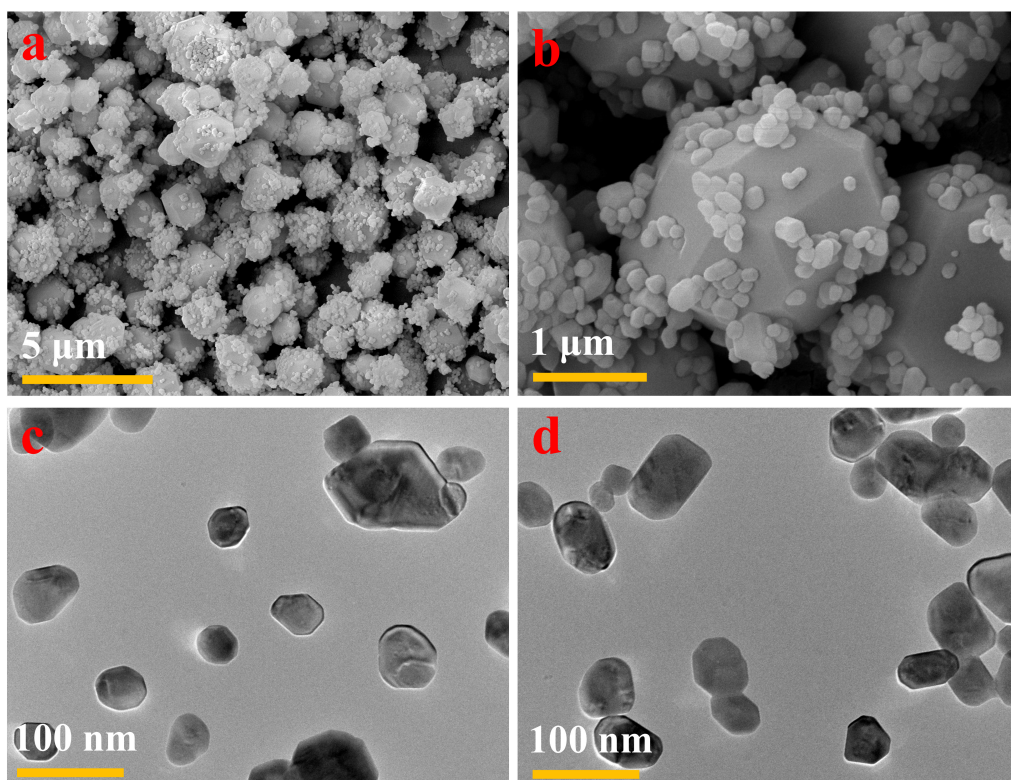

**Figure S3.** (a, b) SEM, (c, d) TEM images of  $\text{KCoF}_3$  sample.

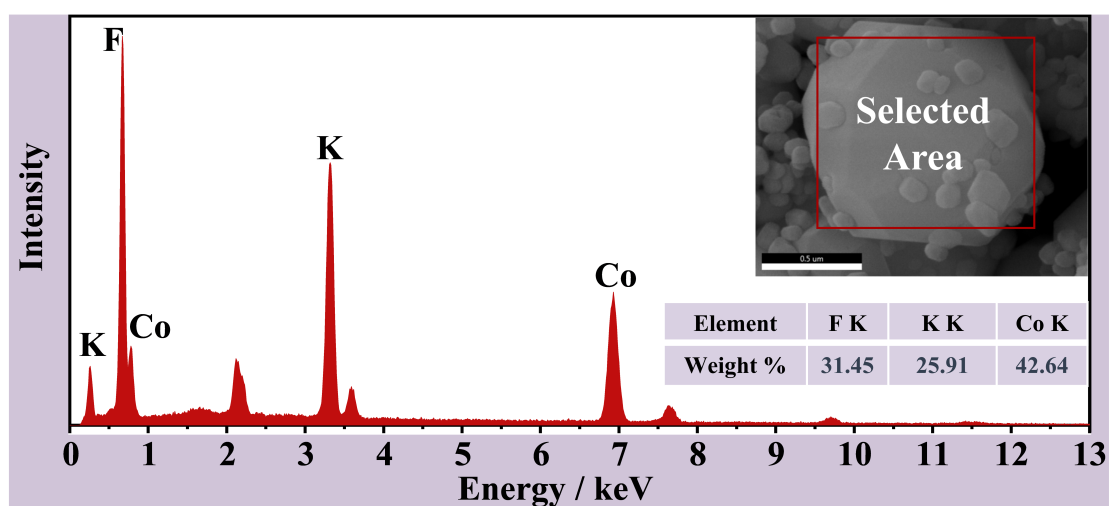

**Figure S4.** EDS of  $\text{KCoF}_3$  sample.

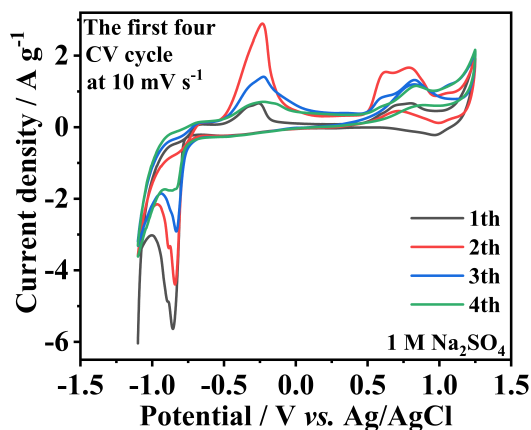

**Figure S5.** The first four CV curves at  $10 \text{ mV s}^{-1}$ .

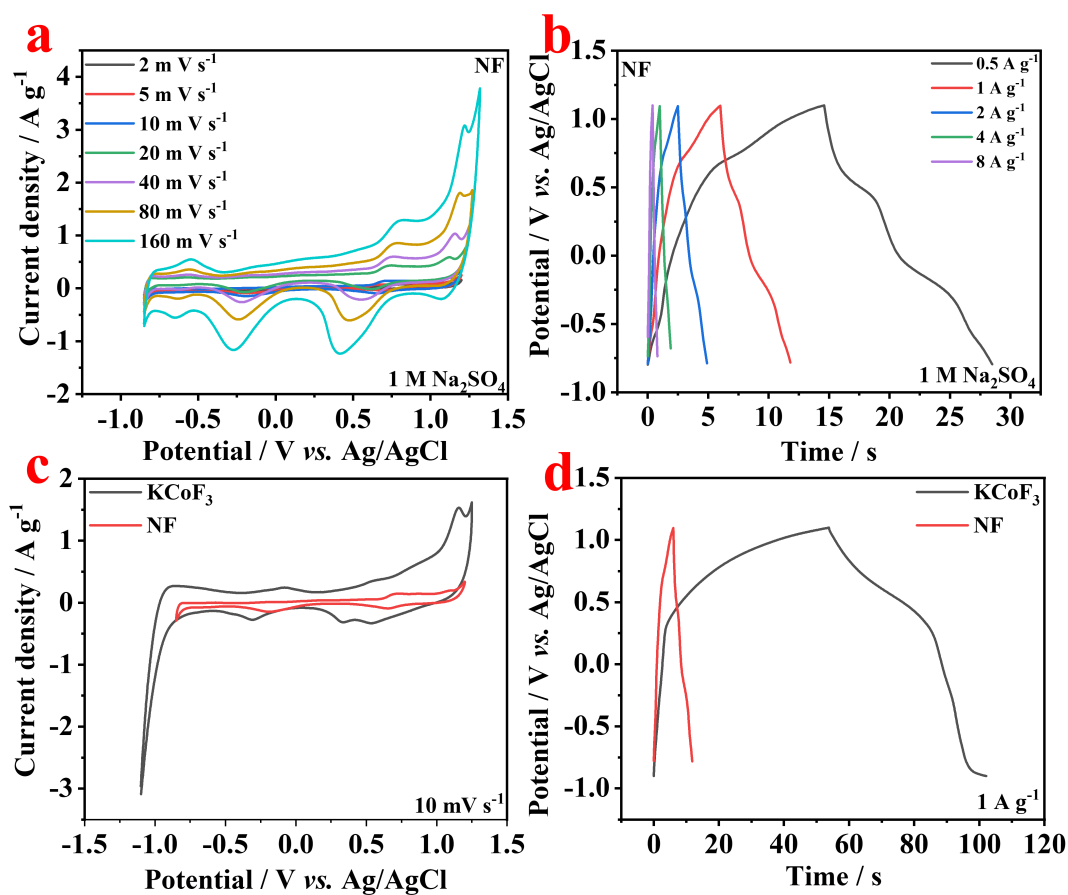

**Figure S6.** (a) CV curves at 2~160  $\text{mV s}^{-1}$ , (b) GCD curves at different current densities of the nickel foma (NF) electrode in 1 M Na<sub>2</sub>SO<sub>4</sub> electrolyte. (c) comparison of CV ( $10 \text{ mV s}^{-1}$ ) and (d) GCD ( $1 \text{ A g}^{-1}$ ) for KCoF<sub>3</sub> and NF electrodes.

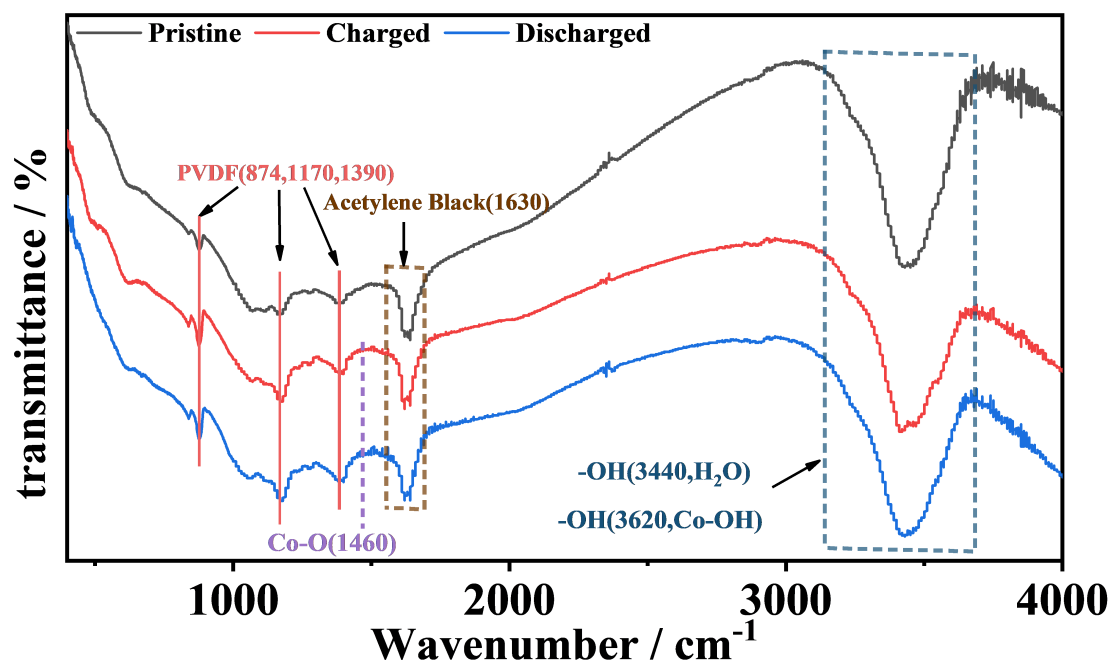

**Figure S7.** Ex situ FTIR spectrum graphs of the KCoF<sub>3</sub> electrode in pristine state and assigned charge/discharge states during the first CV cycle at 10 mV s<sup>-1</sup>.

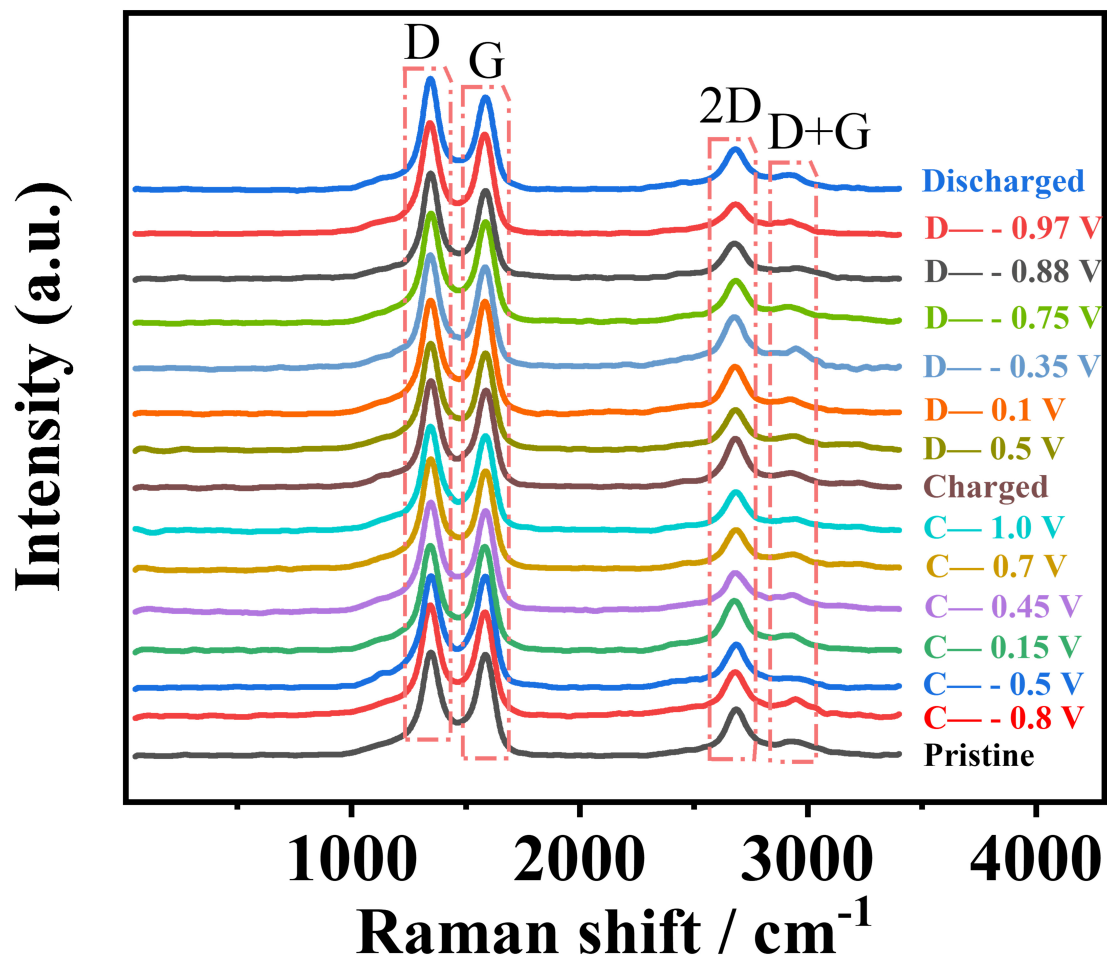

**Figure S8.** Ex situ Raman spectrum graphs of the KCoF<sub>3</sub> electrode in pristine state and assigned specific charge/discharge states during the first CV cycle at 10 mV s<sup>-1</sup>.



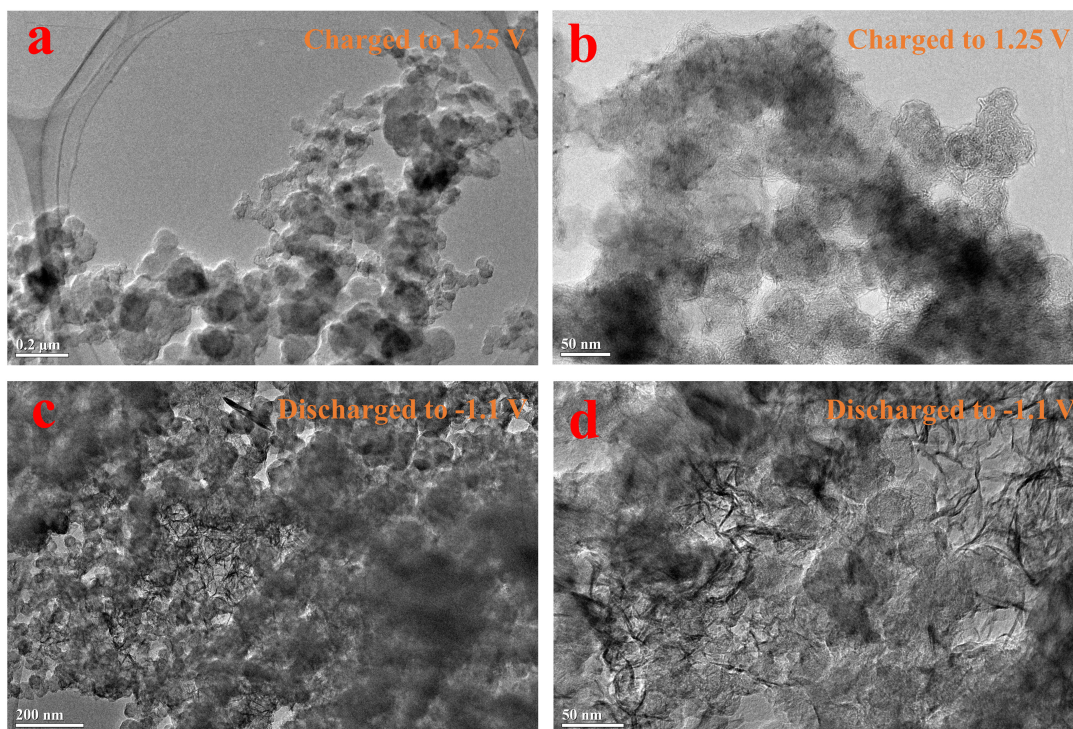

**Figure S9.** Ex situ TEM images of KCoF<sub>3</sub> electrode (a, b) in charging to 1.25 V state, (c, d) in discharging to -1.1 V state of the first CV cycle at 10 mV s<sup>-1</sup>.

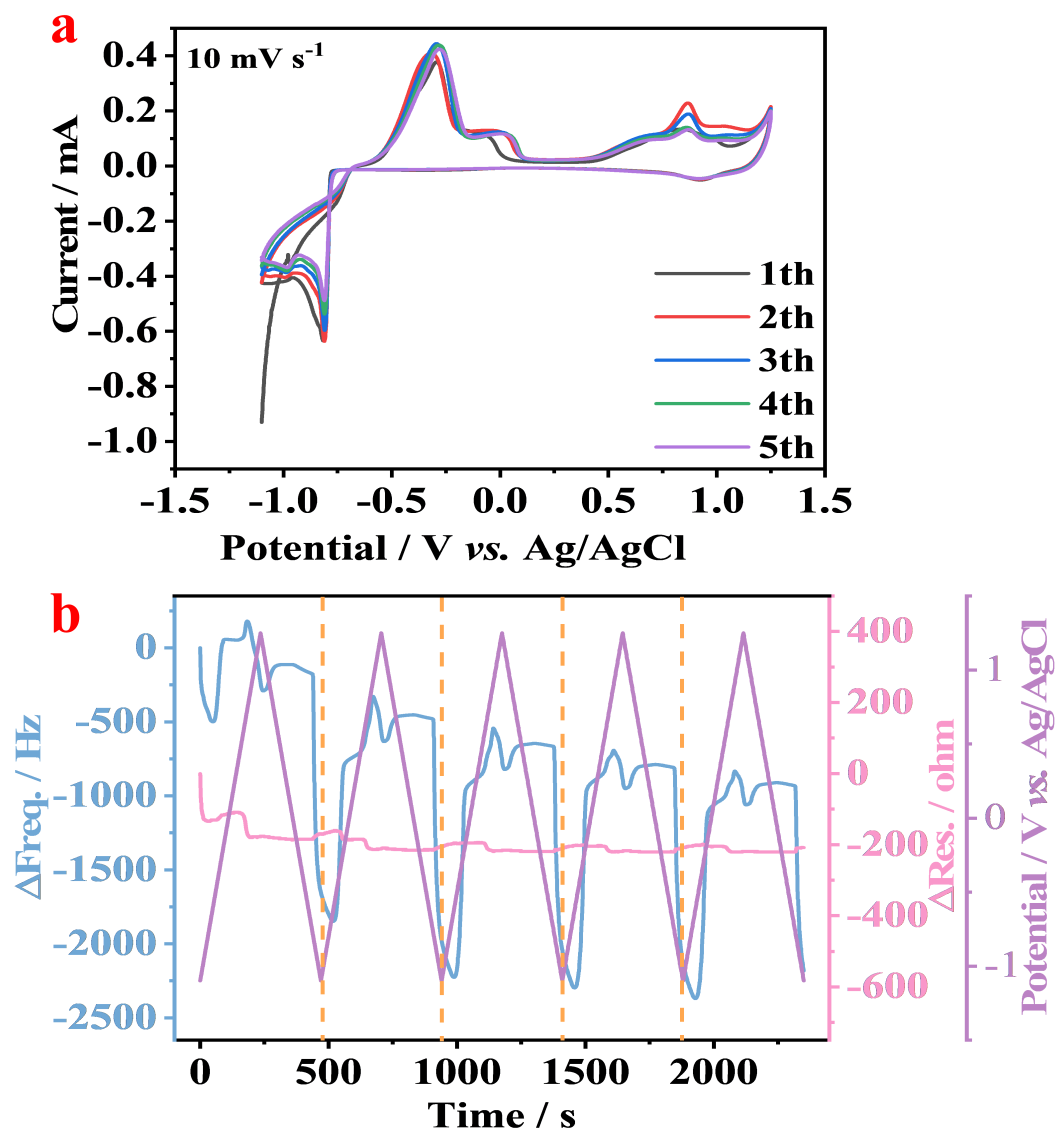

**Figure S10.** (a) CV curves for the first five cycles, (b) Raw EQCM data of the KCoF<sub>3</sub> electrode in 1 M Na<sub>2</sub>SO<sub>4</sub> electrolyte (tested in the EQCM equipment).

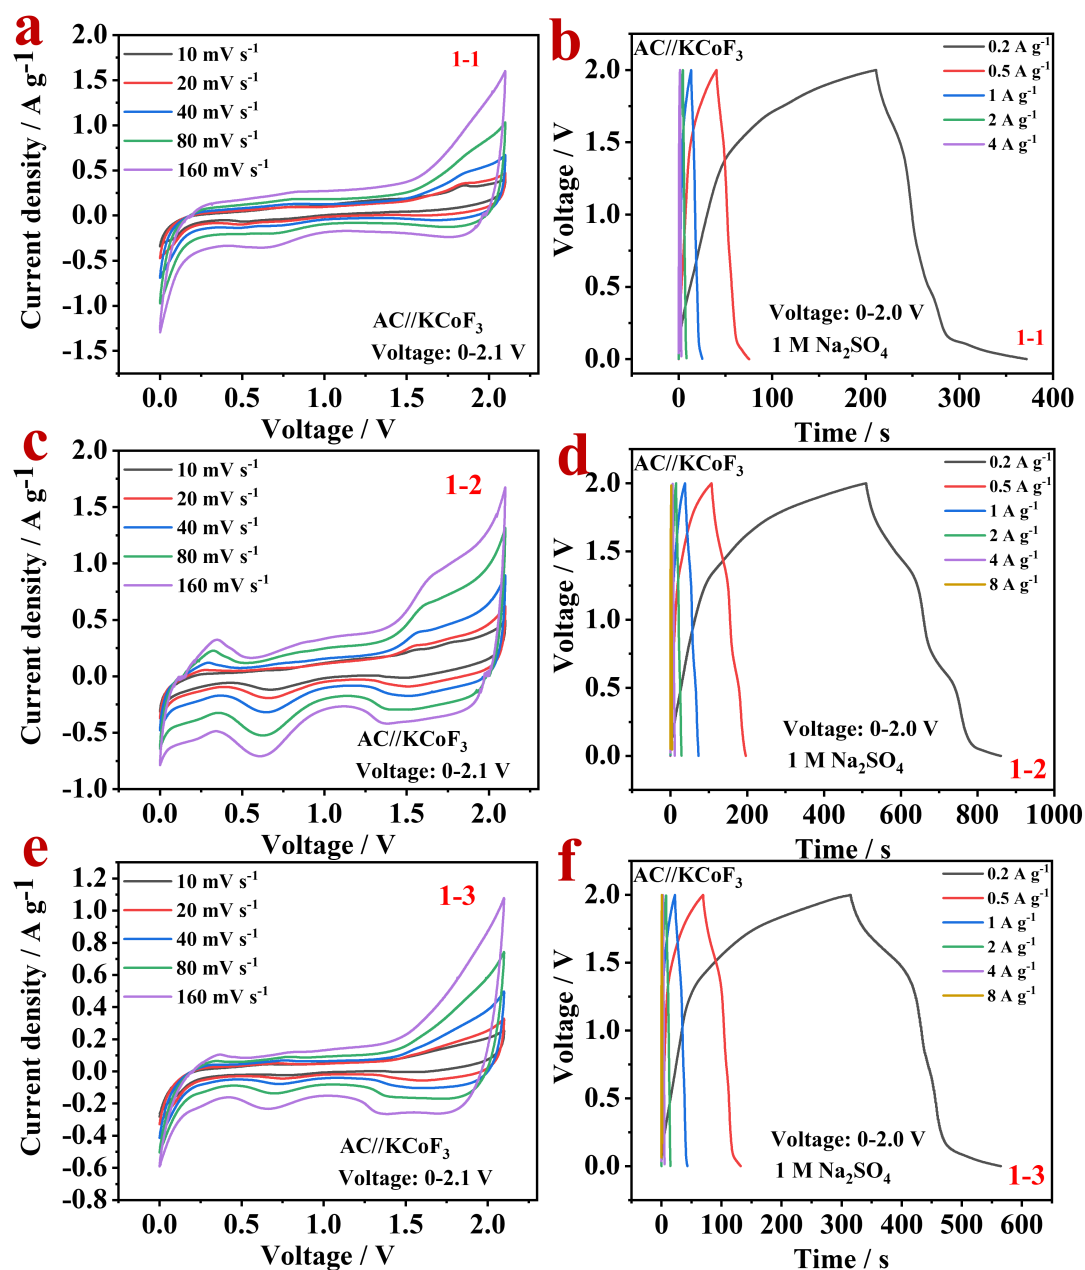

**Figure S11.** Aqueous ECs with positive and negative mass ratios of 1-1, 1-2, 1-3 (a, c, e) CV plots at 10~160 mV s<sup>-1</sup>, (b, d, f) GCD curves at different current densities.

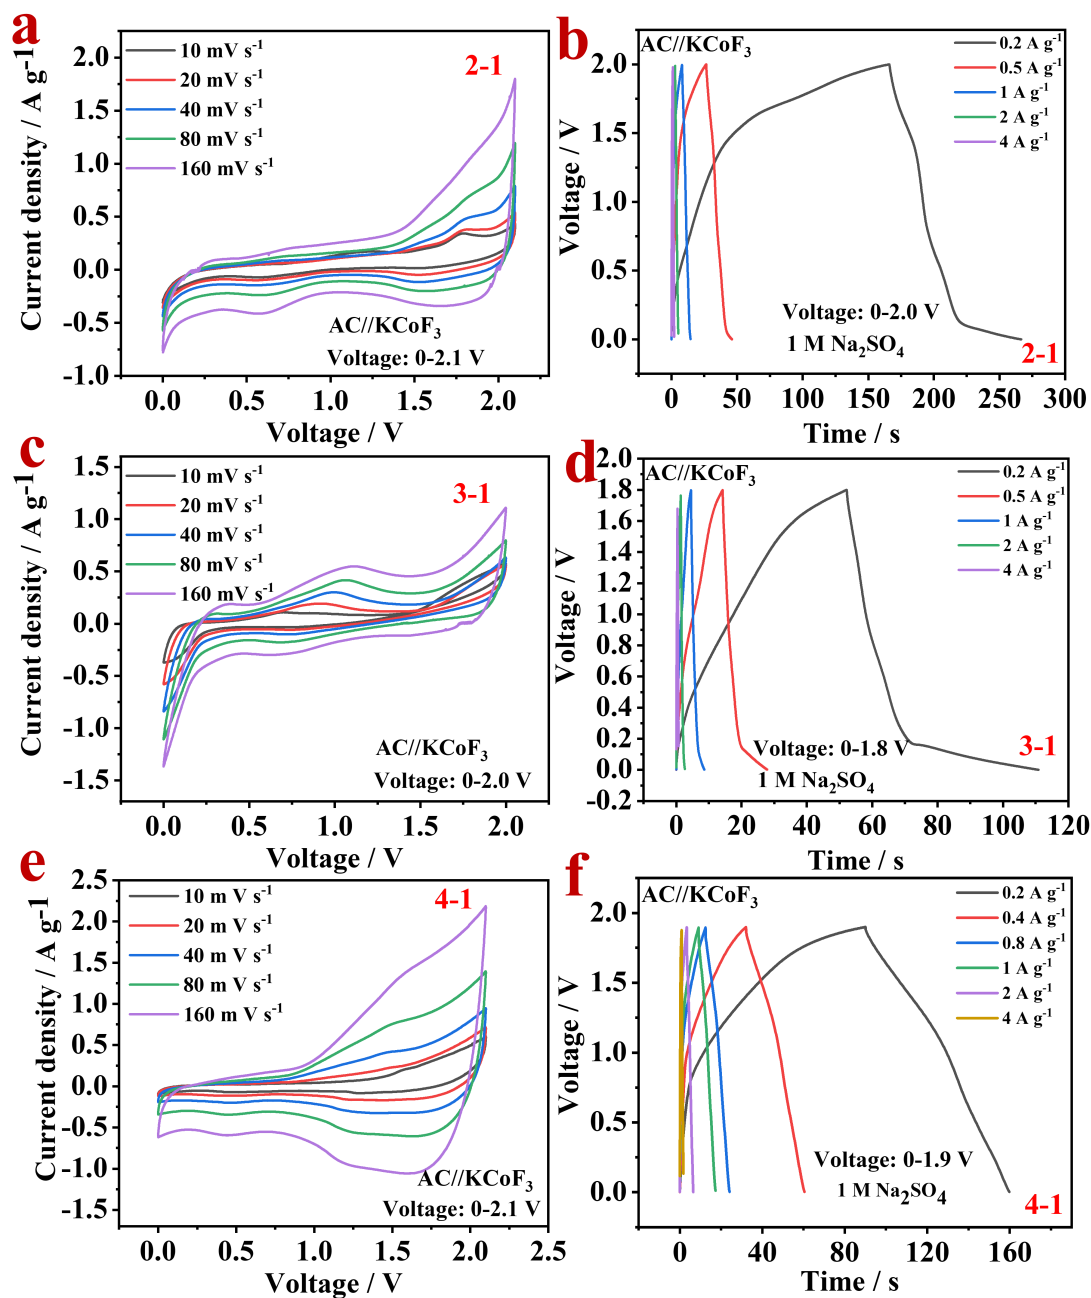

**Figure S12.** Aqueous ECs with positive and negative mass ratios of 2-1, 3-1, 4-1 (a, c, e) CV plots at 10~160 mV s<sup>-1</sup>, (b, d, f) GCD curves at different current densities.

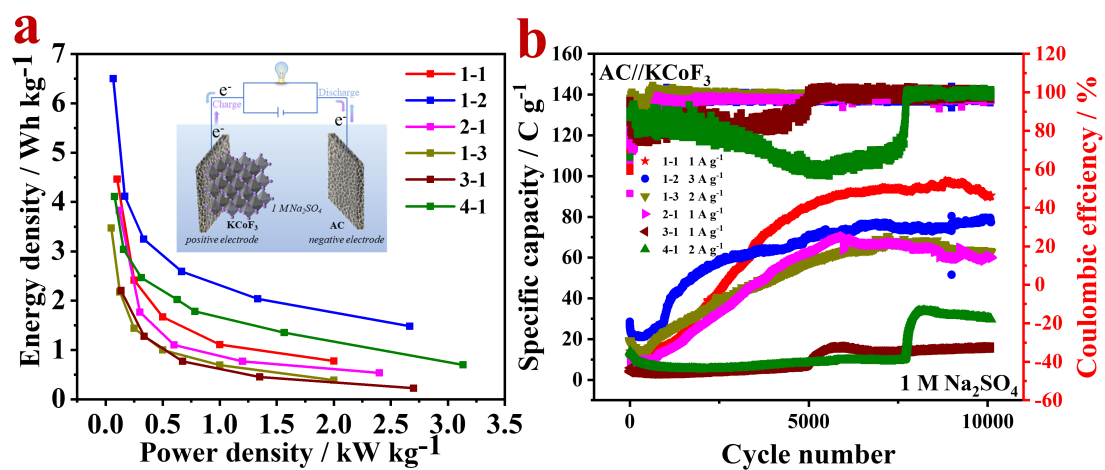

**Figure S13.** (a) Ragone plot (The detailed drawing for aqueous ECs structure), (b) cycling stability of aqueous ECs in different proportions.

## Supplemental tables

**Table S1.** Materials / Chemicals used in this work.

| Materials / Chemicals                  | Type          | Company                                   | Characteristics                                                                 |
|----------------------------------------|---------------|-------------------------------------------|---------------------------------------------------------------------------------|
| CoCl <sub>2</sub> ·6H <sub>2</sub> O   | AR            | SinoPharm                                 | Purity≥99.0%                                                                    |
| KF·2H <sub>2</sub> O                   | AR            | SinoPharm                                 | Purity≥99.0%                                                                    |
| PVP-K30                                | GR            | SinoPharm                                 | #                                                                               |
| Ethylene glycol (EG)                   | AR            | SinoPharm                                 | Purity≥99.0%                                                                    |
| Activated carbon (Ac)                  | YEC-8A        | Fuzhou Yihuan Carbon                      | Density: >0.4 g cm <sup>-3</sup> ;<br>SSA: >2100 m <sup>2</sup> g <sup>-1</sup> |
| N-Methyl pyrrolidone (NMP)             | AR            | Kermel                                    | Purity≥99.0%                                                                    |
| Poly(vinylidene fluoride) (PVDF)       | Battery grade | #                                         | #                                                                               |
| Nickel foam                            | Battery grade | Tianjin Aiweixin Chemical Technology      | Thickness: 1.5mm                                                                |
| Na <sub>2</sub> SO <sub>4</sub>        | AR            | SinoPharm                                 | Purity≥99.0%                                                                    |
| Reference electrode (Ag/AgCl/Satd.KCl) | Ag/AgCl -6.0  | Xuzhou Zhenghao Electronic Technology     | Diameter: 6.0 mm                                                                |
| Working electrode clip (Pt)            | JJ110         | Shanghai Yueci Electronic Technology      | 10*15*0.1 mm<br>Purity (Pt): 99.99%                                             |
| Counter electrode(Pt)                  | #             | Shanghai Three Musk Deer Industry Limited | 10*10*0.2 mm<br>Purity (Pt): 99.99%                                             |

**Table S2.** The EIS parameters before and after cycling for KCoF<sub>3</sub> electrode.

| Model                                     | Before cycling          | After cycling          |
|-------------------------------------------|-------------------------|------------------------|
|                                           | $LR(Q(RW))(QR)$         | $LR(QR)(QR)Q$          |
| $L$ (H)                                   | $5.392 \times 10^{-19}$ | $8.662 \times 10^{-7}$ |
| $R$ ( $\Omega$ )                          | 5.763                   | 4.720                  |
| $Q$ (S·sec <sup><i>n</i></sup> )          | $2.001 \times 10^{-4}$  | $4.155 \times 10^{-3}$ |
| $n$                                       | 0.8852                  | 0.6930                 |
| $R$ ( $\Omega$ )                          | $1.514 \times 10^5$     | 7.667                  |
| $W$ (Y <sub>0</sub> ·sec <sup>0.5</sup> ) | $8.345 \times 10^6$     | #                      |
| $Q$ (S·sec <sup><i>n</i></sup> )          | $1.135 \times 10^{-3}$  | $5.690 \times 10^{-4}$ |
| $n$                                       | 0.632                   | 0.7807                 |
| $R$ ( $\Omega$ )                          | 265.4                   | 1.041                  |
| $Q$ (S·sec <sup><i>n</i></sup> )          | #                       | $1.915 \times 10^{-2}$ |
| $n$                                       | #                       | 0.6791                 |
| Chi-squared ( $\chi^2$ )                  | $7.054 \times 10^{-4}$  | $4.535 \times 10^{-4}$ |

**Table S3.** The crystalline parameters of the newly-formed phases in the fully charged and discharged states of KCoF<sub>3</sub> electrode.

| Phase                          | PDF card | Crystal system | Space group | Cell (a×b×c) /Å      |
|--------------------------------|----------|----------------|-------------|----------------------|
| KCoF <sub>3</sub>              | 18-1006  | Cubic          | Pm-3m       | 4.0708×4.0708×4.0708 |
| CoOOH                          | 26-0480  | Orthorhombic   | Pbnm        | 4.353×9.402×2.84     |
| CoO <sub>2</sub>               | 89-8399  | Hexagonal      | P-3m1       | 2.8208×2.8208×4.2403 |
| Co <sub>3</sub> O <sub>4</sub> | 76-1802  | Cubic          | Fd-3m       | 8.072×8.072×8.072    |
| Co(OH) <sub>2</sub>            | 74-1057  | Hexagonal      | P-3m1       | 3.173×3.173×4.64     |



### Supplemental references

1. Y. Zhu and C. Wang, *The Journal of Physical Chemistry C*, 2010, **114**, 2830-2841.
2. W.-Y. Tsai, P.-L. Taberna and P. Simon, *J. Am. Chem. Soc.*, 2014, **136**, 8722-8728.
3. Y. Ji, Z.-W. Yin, Z. Yang, Y.-P. Deng, H. Chen, C. Lin, L. Yang, K. Yang, M. Zhang, Q. Xiao, J.-T. Li, Z. Chen, S.-G. Sun and F. Pan, *Chem. Soc. Rev.*, 2021, **50**, 10743-10763.
